# Supplementary material for: Comparative Salivary Proteome of Hepatitis B- and C-Infected Patients
Source: PubMed Central journal article supplement (PMC4244100; doi:10.1371/journal.pone.0113683), 2014-11-25
Supplement: pone.0113683.s001.pdf [file pone.0113683.s001.pdf]

Table S1: Complete list of identified proteins in HB, HC and Control (C) groups.

| Identified Proteins (362)                                                                            | Accession Number | Spectrum counts |      |      |
|------------------------------------------------------------------------------------------------------|------------------|-----------------|------|------|
|                                                                                                      |                  | HB              | HC   | C    |
| Alpha-amylase 1                                                                                      | IPI00300786      | 2436            | 1608 | 1800 |
| Isoform 1 of Serum albumin                                                                           | IPI00745872      | 942             | 512  | 1216 |
| Polymeric immunoglobulin receptor                                                                    | IPI00004573      | 1066            | 680  | 724  |
| Prolactin-inducible protein                                                                          | IPI00022974      | 658             | 452  | 944  |
| cDNA FLJ14473 fis, clone MAMMA1001080<br>, highly similar to Homo sapiens SNC73 protein (SNC73) mRNA | IPI00386879      | 566             | 326  | 528  |
| Cystatin-S                                                                                           | IPI00032294      | 598             | 484  | 736  |
| Uncharacterized protein                                                                              | IPI00855918 (+1) | 572             | 380  | 524  |
| IGK@ protein                                                                                         | IPI00784985      | 454             | 400  | 404  |
| Cystatin-SN                                                                                          | IPI00305477      | 434             | 332  | 360  |
| Zymogen granule protein 16 homolog B                                                                 | IPI00060800      | 264             | 198  | 260  |
| cDNA FLJ60163, highly similar to Carbonic anhydrase 6                                                | IPI00295105      | 184             | 124  | 160  |
| Cystatin-SA                                                                                          | IPI00013382      | 244             | 212  | 240  |
| IGL@ protein                                                                                         | IPI00154742      | 180             | 80   | 176  |
| Actin, cytoplasmic 2                                                                                 | IPI00021440      | 94              | 62   | 284  |
| Serotransferrin                                                                                      | IPI00022463      | 122             | 76   | 188  |
| Keratin, type II cytoskeletal 1                                                                      | IPI00220327      | 54              | 162  | 108  |
| cDNA FLJ36533 fis, clone TRACH2004428, highly similar to Lactotransferrin<br>(Fragment)              | IPI00903112      | 72              | 110  | 148  |
| Uncharacterized protein                                                                              | IPI00925214 (+1) | 98              | 66   | 36   |
| Lactoperoxidase                                                                                      | IPI00025023      | 90              | 58   | 100  |
| Keratin, type I cytoskeletal 10                                                                      | IPI00009865      | 64              | 122  | 92   |
| Hemoglobin subunit alpha                                                                             | IPI00410714      | 34              | 164  | 12   |
| Isoform alpha-enolase of Alpha-enolase                                                               | IPI00465248      | 78              | 44   | 192  |
| UPF0762 protein C6orf58                                                                              | IPI00374315      | 70              | 36   | 112  |
| Bactericidal/permeability-increasing protein-like 1                                                  | IPI00296654      | 82              | 66   | 60   |
| Isoform 1 of Deleted in malignant brain tumors 1 protein                                             | IPI00099110 (+5) | 68              | 46   | 64   |
| Keratin, type I cytoskeletal 9                                                                       | IPI00019359      | 46              | 76   | 36   |
| Lipocalin-1                                                                                          | IPI00009650      | 74              | 46   | 104  |
| Alpha-2-macroglobulin                                                                                | IPI00478003 (+1) | 68              | 50   | 88   |
| Immunoglobulin J chain                                                                               | IPI00178926 (+1) | 80              | 62   | 36   |
| Keratin, type II cytoskeletal 2 epidermal                                                            | IPI00021304      | 34              | 86   | 48   |
| Titin, isoform CRA_a                                                                                 | IPI00940872      | 2               | 0    | 0    |
| Immunoglobulin heavy chain variant (Fragment)                                                        | IPI00940245      | 64              | 32   | 48   |
| Lysozyme C                                                                                           | IPI00019038      | 32              | 38   | 68   |
| Putative uncharacterized protein DKFZp686P15220                                                      | IPI00645363      | 50              | 30   | 72   |
| Hemoglobin subunit beta                                                                              | IPI00654755      | 36              | 62   | 32   |
| Alpha-2-macroglobulin-like protein 1                                                                 | IPI00419215      | 46              | 24   | 72   |
| Submaxillary gland androgen-regulated protein 3B                                                     | IPI00023011      | 20              | 22   | 124  |
| Isoform 2 of Ig mu chain C region                                                                    | IPI00896380      | 46              | 10   | 44   |
| Plastin-2                                                                                            | IPI00010471      | 48              | 22   | 44   |
| Zinc-alpha-2-glycoprotein                                                                            | IPI00166729      | 40              | 24   | 56   |
| Transcobalamin-1                                                                                     | IPI00299729      | 54              | 26   | 44   |
| Thioredoxin                                                                                          | IPI00216298      | 54              | 34   | 40   |
| Glyceraldehyde-3-phosphate dehydrogenase                                                             | IPI00219018      | 30              | 22   | 80   |

**Table S1: Complete list of identified proteins in HB, HC and Control (C) groups.**

|                                                                                    |                  |    |    |    |
|------------------------------------------------------------------------------------|------------------|----|----|----|
| hypothetical protein LOC644893                                                     | IPI00977368      | 0  | 4  | 12 |
| Protein S100-A8                                                                    | IPI00007047      | 50 | 24 | 32 |
| Short palate, lung and nasal epithelium carcinoma-associated protein 2             | IPI00304557      | 84 | 36 | 24 |
| Glucose-6-phosphate isomerase                                                      | IPI00908881      | 44 | 20 | 32 |
| Putative uncharacterized protein DKFZp686O16217 (Fragment)                         | IPI01015266      | 58 | 18 | 8  |
| Cystatin-C                                                                         | IPI00032293      | 40 | 18 | 28 |
| Complement C3 (Fragment)                                                           | IPI00783987      | 24 | 8  | 40 |
| Isoform 1 of Gelsolin                                                              | IPI00026314      | 28 | 26 | 32 |
| Profilin-1                                                                         | IPI00216691      | 28 | 18 | 72 |
| Protein S100-A9                                                                    | IPI00027462      | 28 | 8  | 48 |
| Isoform 1 of Alpha-1-antitrypsin                                                   | IPI00553177      | 14 | 28 | 20 |
| Isoform 1 of Long palate, lung and nasal epithelium carcinoma-associated protein 1 | IPI00291410      | 36 | 20 | 16 |
| Heat shock 70 kDa protein 1A/1B                                                    | IPI00304925 (+1) | 26 | 12 | 56 |
| Glutathione S-transferase P                                                        | IPI00219757      | 40 | 14 | 32 |
| Protein disulfide-isomerase                                                        | IPI00010796      | 18 | 14 | 20 |
| IgGfc-binding protein                                                              | IPI00242956      | 40 | 4  | 20 |
| Isoform 2A of Desmocollin-2                                                        | IPI00025846 (+1) | 28 | 30 | 12 |
| Myosin-reactive immunoglobulin heavy chain variable region (Fragment)              | IPI00384392      | 34 | 24 | 24 |
| 6-phosphogluconate dehydrogenase, decarboxylating                                  | IPI00219525 (+1) | 36 | 32 | 48 |
| Peptidyl-prolyl cis-trans isomerase A                                              | IPI00419585      | 24 | 12 | 24 |
| Hemopexin                                                                          | IPI00022488      | 28 | 8  | 24 |
| Desmoglein-1                                                                       | IPI00025753      | 6  | 18 | 36 |
| Isoform 1 of Nucleobindin-2                                                        | IPI00009123      | 22 | 18 | 24 |
| Galectin-3-binding protein                                                         | IPI00023673 (+1) | 20 | 24 | 12 |
| Matrix metalloproteinase-9                                                         | IPI00027509      | 16 | 8  | 28 |
| Isoform H17 of Myeloperoxidase                                                     | IPI00007244 (+2) | 26 | 8  | 36 |
| Cystatin-D                                                                         | IPI00002851      | 14 | 14 | 36 |
| Small proline-rich protein 3                                                       | IPI00082931 (+1) | 12 | 12 | 12 |
| Isoform 1 of L-lactate dehydrogenase A chain                                       | IPI00217966 (+1) | 16 | 12 | 32 |
| Fatty acid-binding protein, epidermal                                              | IPI00007797      | 20 | 2  | 24 |
| Phosphoglycerate kinase 1                                                          | IPI00169383      | 14 | 6  | 40 |
| Uncharacterized protein                                                            | IPI00965085      | 14 | 8  | 28 |
| Desmoglein-3                                                                       | IPI00031547      | 26 | 12 | 28 |
| cDNA FLJ52432, highly similar to Leukotriene A-4 hydrolase                         | IPI00790203      | 26 | 10 | 16 |
| Apolipoprotein A-I                                                                 | IPI00021841      | 20 | 8  | 20 |
| Isoform M2 of Pyruvate kinase isozymes M1/M2                                       | IPI00479186      | 14 | 16 | 24 |
| Leukocyte elastase inhibitor                                                       | IPI00027444 (+1) | 16 | 16 | 16 |
| Haptoglobin                                                                        | IPI00641737      | 24 | 2  | 36 |
| Cornulin                                                                           | IPI00297056      | 20 | 12 | 4  |
| Fibrinogen beta chain                                                              | IPI00298497      | 10 | 18 | 24 |
| triosephosphate isomerase isoform 2                                                | IPI00465028 (+1) | 20 | 16 | 16 |
| Keratin, type I cytoskeletal 16                                                    | IPI00217963      | 16 | 22 | 28 |
| Keratin, type II cytoskeletal 5                                                    | IPI00009867      | 4  | 26 | 20 |
| cDNA FLJ54957, highly similar to Transketolase                                     | IPI00643920 (+1) | 18 | 10 | 8  |
| Anti-(ED-B) scFV (Fragment)                                                        | IPI00916434      | 24 | 14 | 32 |

**Table S1: Complete list of identified proteins in HB, HC and Control (C) groups.**

|                                                                                        |                  |    |    |    |
|----------------------------------------------------------------------------------------|------------------|----|----|----|
| Isoform 1 of Kallikrein-1                                                              | IPI00304808      | 12 | 8  | 32 |
| Mucin-7                                                                                | IPI00152154      | 6  | 0  | 12 |
| Retinoblastoma-like protein 2                                                          | IPI00304028      | 2  | 0  | 0  |
| Isoform 1 of 14-3-3 protein sigma                                                      | IPI00013890      | 16 | 8  | 24 |
| Cathepsin D                                                                            | IPI00011229      | 20 | 10 | 24 |
| 14-3-3 protein zeta/delta                                                              | IPI00021263      | 22 | 14 | 24 |
| Transaldolase                                                                          | IPI00744692      | 14 | 4  | 20 |
| Cystatin-B                                                                             | IPI00021828      | 18 | 8  | 16 |
| Phosphoglycerate mutase 1                                                              | IPI00549725      | 30 | 2  | 24 |
| Histatin-3                                                                             | IPI00012026      | 0  | 0  | 4  |
| Isoform 1 of Interleukin-1 receptor antagonist protein                                 | IPI00000045 (+3) | 8  | 4  | 8  |
| Ceruloplasmin                                                                          | IPI00017601      | 8  | 8  | 24 |
| Isoform Gamma-B of Fibrinogen gamma chain                                              | IPI00021891 (+3) | 10 | 8  | 12 |
| 45 kDa protein                                                                         | IPI00796333 (+1) | 14 | 6  | 24 |
| Isoform Sap-mu-9 of Proactivator polypeptide                                           | IPI00744835      | 14 | 6  | 16 |
| Beta-2-microglobulin                                                                   | IPI00004656      | 10 | 14 | 8  |
| Isoform 2 of Obscurin                                                                  | IPI00742748      | 0  | 0  | 4  |
| cDNA FLJ60299, highly similar to Rab GDP dissociation inhibitor beta                   | IPI00031461 (+1) | 16 | 2  | 16 |
| Putative uncharacterized protein DKFZp686C15213                                        | IPI00426051      | 20 | 8  | 24 |
| 78 kDa glucose-regulated protein                                                       | IPI00003362      | 20 | 12 | 16 |
| cDNA FLJ53019, highly similar to Serpin B13                                            | IPI00006560 (+1) | 18 | 4  | 12 |
| Alpha-actinin-4                                                                        | IPI00013808 (+1) | 14 | 6  | 20 |
| Isoform 1 of Heat shock cognate 71 kDa protein                                         | IPI00003865      | 16 | 8  | 24 |
| Sortilin-related receptor                                                              | IPI00022608      | 2  | 2  | 4  |
| Moesin                                                                                 | IPI00219365      | 12 | 6  | 16 |
| glycogen phosphorylase, liver form isoform 2                                           | IPI00943894      | 8  | 4  | 28 |
| Rho GDP-dissociation inhibitor 2                                                       | IPI00003817      | 4  | 6  | 20 |
| Peroxiredoxin-1                                                                        | IPI00000874      | 10 | 10 | 8  |
| Peroxiredoxin-6                                                                        | IPI00220301      | 8  | 2  | 12 |
| cDNA FLJ41552 fis, clone COLON2004478, highly similar to Protein Tro alpha1 H,myeloma  | IPI00647704      | 10 | 4  | 4  |
| Isoform 1 of Dipeptidyl peptidase 1                                                    | IPI00022810 (+1) | 6  | 6  | 8  |
| Isoform 1 of WAP four-disulfide core domain protein 2                                  | IPI00291488      | 18 | 2  | 12 |
| cDNA FLJ39690 fis, clone SMINT2010639, highly similar to PHOSPHOLIPID TRANSFER PROTEIN | IPI00643034 (+1) | 8  | 10 | 4  |
| Calmodulin-like protein 3                                                              | IPI00216984      | 10 | 8  | 12 |
| Isoform 1 of Adenylyl cyclase-associated protein 1                                     | IPI00008274 (+1) | 4  | 10 | 24 |
| Cornifin-A                                                                             | IPI00017987      | 10 | 2  | 4  |
| Leucine-rich alpha-2-glycoprotein                                                      | IPI00022417      | 8  | 2  | 16 |
| Cofilin-1                                                                              | IPI00012011 (+2) | 6  | 10 | 16 |
| Isoform 1 of Dynein heavy chain 2, axonemal                                            | IPI00783464      | 0  | 2  | 0  |
| Ly6/PLAUR domain-containing protein 3                                                  | IPI00004310 (+1) | 16 | 4  | 12 |
| Isoform 1 of Clusterin                                                                 | IPI00291262 (+3) | 8  | 10 | 8  |
| Peptidyl-prolyl cis-trans isomerase B                                                  | IPI00646304      | 4  | 6  | 20 |
| Isoform 1 of Acyl-CoA-binding protein                                                  | IPI00010182 (+5) | 4  | 6  | 4  |
| Rheumatoid factor C6 light chain (Fragment)                                            | IPI00829956      | 22 | 4  | 12 |

**Table S1: Complete list of identified proteins in HB, HC and Control (C) groups.**

|                                                                                      |                  |    |    |    |
|--------------------------------------------------------------------------------------|------------------|----|----|----|
| Similar to VH4 heavy chain variable region precursor                                 | IPI00977297      | 12 | 0  | 0  |
| Ig heavy chain V-III region GAL                                                      | IPI00382500      | 10 | 4  | 8  |
| Isoform DPI of Desmoplakin                                                           | IPI00013933 (+2) | 4  | 14 | 8  |
| cDNA FLJ25678 fis, clone TST04067, highly similar to PURINE NUCLEOSIDE PHOSPHORYLASE | IPI00017672      | 14 | 4  | 16 |
| Alpha-1-acid glycoprotein 1                                                          | IPI00022429      | 8  | 0  | 24 |
| Isoform 1 of Fibrinogen alpha chain                                                  | IPI00021885      | 2  | 6  | 0  |
| Protein S100-A11                                                                     | IPI00013895      | 8  | 4  | 16 |
| Isoform f-I of Serine protease inhibitor Kazal-type 5                                | IPI00478816 (+1) | 8  | 4  | 20 |
| Transgelin-2                                                                         | IPI00550363 (+2) | 14 | 8  | 4  |
| Isoform 5 of Peptidyl-glycine alpha-amidating monooxygenase                          | IPI00177543 (+2) | 4  | 4  | 0  |
| Nucleobindin-1                                                                       | IPI00295542      | 4  | 6  | 8  |
| Isoform Long of Glucose-6-phosphate 1-dehydrogenase                                  | IPI00216008 (+3) | 6  | 4  | 4  |
| Putative uncharacterized protein                                                     | IPI00010402 (+2) | 10 | 12 | 12 |
| Rheumatoid factor D5 light chain (Fragment)                                          | IPI00816799 (+1) | 12 | 8  | 12 |
| Putative uncharacterized protein DKFZp686M24218                                      | IPI00930442      | 12 | 4  | 8  |
| Isoform 1 of Chromodomain-helicase-DNA-binding protein 1                             | IPI00297851 (+1) | 0  | 0  | 4  |
| Malate dehydrogenase, cytoplasmic                                                    | IPI00916111 (+1) | 10 | 6  | 8  |
| Ig kappa chain V-II region TEW                                                       | IPI00736885      | 6  | 2  | 8  |
| Isoform 1 of von Willebrand factor A domain-containing protein 3A                    | IPI00740853      | 2  | 2  | 0  |
| Ig kappa chain V-IV region Len                                                       | IPI00387120      | 12 | 8  | 4  |
| Retrotransposon gag domain-containing protein 1                                      | IPI00514462      | 0  | 0  | 4  |
| Sin3 histone deacetylase corepressor complex component SDS3                          | IPI00607645 (+1) | 2  | 6  | 0  |
| Protein-glutamine gamma-glutamyltransferase E                                        | IPI00300376      | 4  | 4  | 0  |
| Putative uncharacterized protein                                                     | IPI00973474      | 8  | 2  | 8  |
| Ig heavy chain V-III region BUT                                                      | IPI00382481      | 4  | 2  | 4  |
| Myosin-reactive immunoglobulin heavy chain variable region (Fragment)                | IPI00783024      | 6  | 6  | 12 |
| Uncharacterized protein                                                              | IPI00952742      | 4  | 0  | 0  |
| Keratin, type II cytoskeletal 6C                                                     | IPI00299145 (+2) | 4  | 4  | 20 |
| Transmembrane protease serine 11D                                                    | IPI00003542 (+1) | 12 | 6  | 4  |
| Isoform 1 of Hemicentin-2                                                            | IPI00936570      | 0  | 2  | 0  |
| cDNA FLJ55606, highly similar to Alpha-2-HS-glycoprotein                             | IPI00022431 (+1) | 8  | 4  | 8  |
| cysteine-rich secretory protein 3 isoform 1 precursor                                | IPI00942117 (+1) | 6  | 0  | 20 |
| Isoform 1 of Nexilin                                                                 | IPI00180404 (+3) | 2  | 0  | 0  |
| suprabasin isoform 1 precursor                                                       | IPI00947285      | 0  | 6  | 16 |
| Antileukoproteinase                                                                  | IPI00008580      | 4  | 2  | 0  |
| Uncharacterized protein                                                              | IPI00643525 (+6) | 8  | 2  | 16 |
| Isoform 1 of Coiled-coil domain-containing protein 112                               | IPI00746232 (+2) | 4  | 4  | 0  |
| Trefoil factor 3                                                                     | IPI00018909      | 4  | 2  | 8  |
| Ig heavy chain V-III region WEA                                                      | IPI00382476      | 6  | 2  | 4  |
| Calmodulin                                                                           | IPI00075248 (+3) | 6  | 8  | 4  |
| Metalloproteinase inhibitor 1                                                        | IPI00032292 (+1) | 8  | 2  | 12 |
| Histone H4                                                                           | IPI00453473      | 12 | 6  | 4  |
| Uncharacterized protein                                                              | IPI00936857 (+1) | 0  | 4  | 0  |
| cDNA FLJ35730 fis, clone TEST12003131, highly similar to ALPHA-1-ANTITRYPSIN         | IPI00550991 (+1) | 8  | 4  | 12 |

**Table S1: Complete list of identified proteins in HB, HC and Control (C) groups.**

|                                                                     |                  |    |    |    |
|---------------------------------------------------------------------|------------------|----|----|----|
| Carboxypeptidase E precursor                                        | IPI00031121 (+1) | 4  | 0  | 8  |
| Carbonic anhydrase 1                                                | IPI00215983      | 2  | 14 | 0  |
| Catalase                                                            | IPI00465436      | 8  | 2  | 8  |
| SPARC-like protein 1                                                | IPI00296777      | 2  | 4  | 12 |
| Monocyte differentiation antigen CD14                               | IPI00029260 (+1) | 6  | 6  | 4  |
| Chitinase-3-like protein 2                                          | IPI00019533 (+1) | 6  | 4  | 4  |
| Ig kappa chain V-I region Roy                                       | IPI00387100      | 10 | 6  | 8  |
| Angiotensinogen                                                     | IPI00032220      | 8  | 2  | 20 |
| ERO1-like protein alpha                                             | IPI00386755      | 2  | 0  | 8  |
| Phosphatidylethanolamine-binding protein 1                          | IPI00219446      | 16 | 2  | 4  |
| Isoform 1 of Kallikrein-11                                          | IPI00002818 (+2) | 6  | 0  | 8  |
| Calreticulin                                                        | IPI00020599      | 4  | 6  | 0  |
| Isoform 2 of Transformation/transcription domain-associated protein | IPI00879277      | 2  | 0  | 0  |
| Peroxiredoxin-2                                                     | IPI00027350 (+1) | 8  | 6  | 4  |
| Protein Plunc                                                       | IPI00009856 (+1) | 10 | 6  | 4  |
| Histatin-1                                                          | IPI00012024      | 4  | 4  | 12 |
| Vimentin                                                            | IPI00418471 (+1) | 6  | 2  | 8  |
| Isoform 1 of Keratin, type I cytoskeletal 13                        | IPI00009866      | 6  | 0  | 4  |
| Alpha-1-acid glycoprotein 2                                         | IPI00020091      | 2  | 2  | 20 |
| Putative uncharacterized protein DKFZp686I04196 (Fragment)          | IPI00399007      | 8  | 4  | 4  |
| Afamin                                                              | IPI00019943      | 0  | 0  | 8  |
| Isoform 1 of Ribonuclease T2                                        | IPI00414896 (+3) | 6  | 2  | 0  |
| Cathelicidin antimicrobial peptide precursor                        | IPI00292532      | 6  | 0  | 8  |
| Coactosin-like protein                                              | IPI00017704      | 2  | 0  | 4  |
| 13 kDa protein                                                      | IPI00829827      | 6  | 4  | 4  |
| Isoform 1 of Alpha-actinin-1                                        | IPI00013508 (+3) | 4  | 0  | 8  |
| Isoform 3 of Mesothelin                                             | IPI00793649      | 4  | 4  | 8  |
| Keratin, type I cytoskeletal 14                                     | IPI00384444      | 2  | 8  | 8  |
| Beta-2-glycoprotein 1                                               | IPI00298828      | 2  | 0  | 4  |
| L-lactate dehydrogenase B chain                                     | IPI00219217      | 4  | 0  | 12 |
| Uncharacterized protein                                             | IPI01013441      | 2  | 0  | 4  |
| Isoform 1 of Neutrophil gelatinase-associated lipocalin             | IPI00299547 (+1) | 8  | 6  | 0  |
| Neutrophil collagenase                                              | IPI00027846      | 0  | 0  | 20 |
| Isoform 2 of Phosphoglucomutase-1                                   | IPI00217872 (+2) | 2  | 6  | 8  |
| Isoform 1 of Vinculin                                               | IPI00291175 (+1) | 4  | 0  | 4  |
| Small proline-rich protein 2E                                       | IPI00386597      | 10 | 4  | 0  |
| Isoform 1 of Brain acid soluble protein 1                           | IPI00299024      | 4  | 2  | 12 |
| Heat shock-related 70 kDa protein 2                                 | IPI00007702      | 2  | 2  | 0  |
| Golgi membrane protein 1                                            | IPI00171411 (+1) | 4  | 4  | 12 |
| Isoform 1 of Alpha-1B-glycoprotein                                  | IPI00022895      | 8  | 2  | 8  |
| Protein FAM3D                                                       | IPI00060143      | 4  | 0  | 8  |
| Actin-related protein 2/3 complex subunit 3                         | IPI00005162      | 2  | 0  | 4  |
| Ezrin                                                               | IPI00843975 (+1) | 2  | 8  | 8  |
| Aldehyde dehydrogenase, dimeric NADP-preferring                     | IPI00296183 (+1) | 6  | 4  | 4  |
| Basic salivary proline-rich protein 2                               | IPI00552432      | 6  | 4  | 4  |

**Table S1: Complete list of identified proteins in HB, HC and Control (C) groups.**

|                                                                                              |                   |   |   |    |
|----------------------------------------------------------------------------------------------|-------------------|---|---|----|
| Isoform 2 of Poly(U)-specific endoribonuclease                                               | IPI00006995 (+2)  | 6 | 0 | 0  |
| Histone H2B type 2-E                                                                         | IPI00003935 (+17) | 4 | 0 | 4  |
| Isoform 1 of Protein furry homolog-like                                                      | IPI00739940 (+1)  | 0 | 2 | 0  |
| Hornerin                                                                                     | IPI00398625       | 2 | 2 | 0  |
| cDNA FLJ78387                                                                                | IPI00876888       | 4 | 2 | 0  |
| calumenin isoform c precurosr                                                                | IPI00789155 (+1)  | 4 | 0 | 0  |
| cDNA FLJ43795 fis, clone TEST14000079                                                        | IPI00171456       | 2 | 0 | 4  |
| Isoform 1 of Granulins                                                                       | IPI00296713       | 6 | 4 | 0  |
| Isoform 3 of Prominin-1                                                                      | IPI00971071       | 2 | 4 | 0  |
| Isoform 1 of Striated muscle preferentially expressed protein kinase                         | IPI00658151 (+1)  | 2 | 0 | 0  |
| Talin-1                                                                                      | IPI00298994       | 6 | 0 | 4  |
| Calmodulin-like protein 5                                                                    | IPI00021536       | 4 | 6 | 4  |
| 33 kDa protein                                                                               | IPI00967467       | 0 | 2 | 4  |
| Coronin-1A                                                                                   | IPI00010133       | 4 | 2 | 8  |
| Cathepsin B                                                                                  | IPI00295741 (+1)  | 0 | 2 | 4  |
| cDNA FLJ59142, highly similar to Epididymal secretory protein E1                             | IPI00301579 (+2)  | 2 | 2 | 8  |
| Isoform 1 of Electroneutral sodium bicarbonate exchanger 1                                   | IPI00737057       | 0 | 0 | 4  |
| Isoform Mitochondrial of Peroxiredoxin-5, mitochondrial                                      | IPI00024915 (+2)  | 6 | 2 | 4  |
| Isoform 1 of Liver carboxylesterase 1                                                        | IPI00010180 (+3)  | 2 | 0 | 0  |
| Neutrophil defensin 1                                                                        | IPI00005721 (+1)  | 2 | 2 | 16 |
| Nicotinamide phosphoribosyltransferase                                                       | IPI00018873       | 4 | 0 | 12 |
| Isoform Long of 14-3-3 protein beta/alpha                                                    | IPI00216318 (+1)  | 4 | 2 | 8  |
| H/ACA ribonucleoprotein complex subunit 4 isoform 2                                          | IPI00915274       | 0 | 0 | 4  |
| Annexin A1                                                                                   | IPI00218918 (+1)  | 6 | 4 | 8  |
| Transthyretin                                                                                | IPI00022432 (+2)  | 4 | 2 | 0  |
| Isoform 1 of Translation initiation factor eIF-2B subunit delta                              | IPI00005979 (+5)  | 6 | 0 | 4  |
| Nucleoside diphosphate kinase                                                                | IPI00604590 (+1)  | 2 | 2 | 8  |
| Heat shock 70 kDa protein 6                                                                  | IPI00339269       | 6 | 2 | 0  |
| Isoform 1 of Serpin B5                                                                       | IPI00783625       | 2 | 2 | 8  |
| Autophagy-related protein 2 homolog B                                                        | IPI00872410       | 2 | 0 | 0  |
| Peptidoglycan recognition protein 1                                                          | IPI00021085       | 6 | 0 | 4  |
| Uncharacterized protein                                                                      | IPI00943181       | 4 | 4 | 4  |
| Full-length cDNA 5-PRIME end of clone CS0DF001YB10 of Fetal brain of Homo sapiens (Fragment) | IPI01009227       | 2 | 2 | 0  |
| Actin-related protein 2/3 complex subunit 4                                                  | IPI00554811 (+2)  | 6 | 2 | 0  |
| Histone H2A type 1-D                                                                         | IPI00255316       | 4 | 4 | 0  |
| cDNA FLJ55673, highly similar to Complement factor B                                         | IPI00019591 (+4)  | 4 | 2 | 8  |
| Similar to Ig heavy chain V-I region HG3 precursor                                           | IPI00739205       | 8 | 0 | 4  |
| Galectin-3                                                                                   | IPI00465431       | 4 | 4 | 0  |
| Similar to VH-3 family (VH26)D/J protein                                                     | IPI00985211       | 6 | 2 | 4  |
| Uncharacterized protein                                                                      | IPI00979039       | 0 | 0 | 4  |
| Actin-related protein 3                                                                      | IPI00028091       | 4 | 0 | 4  |
| cDNA FLJ58687, highly similar to Tubulin alpha-4 chain                                       | IPI00794663 (+1)  | 2 | 2 | 4  |
| Histone H3.1                                                                                 | IPI00465070       | 2 | 2 | 4  |
| Isoform 2 of 5'-3' exoribonuclease 1                                                         | IPI00657645       | 0 | 2 | 0  |

**Table S1: Complete list of identified proteins in HB, HC and Control (C) groups.**

|                                                                        |                  |   |   |    |
|------------------------------------------------------------------------|------------------|---|---|----|
| Isoform Non-muscle of Myosin light polypeptide 6                       | IPI00335168 (+7) | 2 | 2 | 12 |
| Isoform 1 of Serpin B3                                                 | IPI00022204 (+1) | 4 | 0 | 0  |
| Isoform HMW of Kininogen-1                                             | IPI00032328 (+3) | 0 | 4 | 4  |
| Flavin reductase                                                       | IPI00783862      | 0 | 8 | 0  |
| Hemoglobin subunit gamma-1                                             | IPI00220706      | 0 | 8 | 0  |
| IGK@ protein                                                           | IPI00784865      | 8 | 2 | 0  |
| Olfactomedin-4                                                         | IPI00022255      | 4 | 4 | 0  |
| Secretoglobin family 3A member 1                                       | IPI00066193      | 4 | 4 | 0  |
| 64 kDa protein                                                         | IPI00290078      | 0 | 0 | 12 |
| Ig kappa chain V-III region VH (Fragment)                              | IPI00829834      | 4 | 2 | 4  |
| Isoform 1 of Keratin, type II cytoskeletal 78                          | IPI00477227      | 0 | 4 | 0  |
| Ubiquitin-like modifier-activating enzyme 1                            | IPI00645078      | 2 | 0 | 4  |
| Isoform 2 of Neutral alpha-glucosidase AB                              | IPI00011454 (+1) | 0 | 2 | 0  |
| Nucleotide exchange factor SIL1                                        | IPI00296197      | 2 | 0 | 0  |
| Proteasome activator complex subunit 1                                 | IPI00479722      | 2 | 4 | 0  |
| Synaptic vesicle membrane protein VAT-1 homolog                        | IPI00156689      | 6 | 0 | 8  |
| Ras GTPase-activating-like protein IQGAP1                              | IPI00009342      | 0 | 0 | 4  |
| Involucrin                                                             | IPI00011692 (+1) | 4 | 4 | 0  |
| Corticosteroid-binding globulin                                        | IPI00027482      | 2 | 4 | 0  |
| Inositol polyphosphate 1-phosphatase                                   | IPI00027139 (+2) | 4 | 0 | 0  |
| NAD(P) transhydrogenase, mitochondrial                                 | IPI00337541 (+1) | 0 | 0 | 4  |
| Isoform RF1/RF2 of Retrotransposon-derived protein PEG10               | IPI00022095 (+2) | 0 | 0 | 4  |
| Collagen alpha-4(IV) chain                                             | IPI00478572 (+1) | 0 | 2 | 0  |
| Isoform 2 of Actin-binding LIM protein 1                               | IPI00456617 (+2) | 2 | 0 | 0  |
| cDNA FLJ59211, highly similar to Glucosidase 2 subunit beta            | IPI00026154 (+1) | 0 | 6 | 0  |
| cDNA FLJ54977, weakly similar to Proline-rich protein 4                | IPI00856018      | 4 | 2 | 0  |
| 38 kDa protein                                                         | IPI00872245      | 2 | 0 | 0  |
| Isoform A of Golgi SNAP receptor complex member 2                      | IPI00023135 (+3) | 2 | 0 | 0  |
| C-myc promoter-binding protein                                         | IPI00396063 (+1) | 2 | 0 | 0  |
| Similar to Hepatitis B virus receptor binding protein                  | IPI00983475      | 0 | 0 | 4  |
| Malate dehydrogenase, mitochondrial                                    | IPI00291006      | 4 | 1 | 0  |
| Isoform 2 of Prostatic acid phosphatase                                | IPI00289983 (+2) | 4 | 2 | 0  |
| Resistin                                                               | IPI00006988      | 2 | 0 | 4  |
| Isoform 1 of Apoptosis-associated speck-like protein containing a CARD | IPI00001699 (+2) | 0 | 2 | 4  |
| Isoform 1 of Arginase-1                                                | IPI00291560 (+1) | 2 | 2 | 0  |
| Isoform 2 of Protein CASC5                                             | IPI00170766 (+1) | 0 | 2 | 0  |
| Tubulin alpha-1A chain                                                 | IPI00180675 (+4) | 0 | 2 | 4  |
| 28S ribosomal protein S22, mitochondrial                               | IPI00013146 (+2) | 0 | 2 | 0  |
| Chloride intracellular channel protein 1                               | IPI00010896      | 0 | 2 | 0  |
| Adenylosuccinate synthetase isozyme 2                                  | IPI00026833      | 0 | 0 | 8  |
| Isoform 2 of Neural cell adhesion molecule L1-like protein             | IPI00299059      | 2 | 0 | 0  |
| Pre-mRNA-processing factor 6                                           | IPI00305068 (+1) | 0 | 2 | 0  |
| Carbonic anhydrase 2                                                   | IPI00218414      | 2 | 6 | 0  |
| Hemoglobin Lepore-Baltimore (Fragment)                                 | IPI00829896      | 2 | 6 | 0  |

**Table S1: Complete list of identified proteins in HB, HC and Control (C) groups.**

|                                                                                  |                  |   |   |    |
|----------------------------------------------------------------------------------|------------------|---|---|----|
| Isocitrate dehydrogenase [NADP] cytoplasmic                                      | IPI00027223      | 0 | 2 | 4  |
| Isoform 1 of Oxysterol-binding protein-related protein 2                         | IPI00014137      | 2 | 0 | 0  |
| Isoform 2 of Protein Wnt-2b                                                      | IPI00004121 (+2) | 2 | 0 | 0  |
| Enamelin                                                                         | IPI00016685      | 2 | 0 | 0  |
| Cystatin-A                                                                       | IPI00032325      | 4 | 0 | 0  |
| Isoform 2 of Keratin, type II cytoskeletal 80                                    | IPI00431749 (+1) | 0 | 4 | 0  |
| Furin                                                                            | IPI00018387      | 2 | 2 | 0  |
| perilipin-3 isoform 3                                                            | IPI00106668 (+2) | 0 | 0 | 4  |
| Carboxypeptidase D                                                               | IPI00027078 (+2) | 2 | 0 | 4  |
| Acylamino-acid-releasing enzyme                                                  | IPI00337741 (+1) | 0 | 0 | 4  |
| ADP-ribosylation factor 1                                                        | IPI00215914 (+2) | 0 | 0 | 8  |
| Ig lambda chain V-IV region MOL                                                  | IPI00386576      | 4 | 0 | 0  |
| Inter-alpha (Globulin) inhibitor H2, isoform CRA_a                               | IPI00305461 (+2) | 0 | 1 | 0  |
| Protein FAM49B                                                                   | IPI00303318      | 0 | 0 | 12 |
| Isoform 1 of Ermin                                                               | IPI00006746 (+1) | 2 | 2 | 0  |
| Isoform 1 of WD repeat-containing protein 1                                      | IPI00746165      | 2 | 0 | 0  |
| Uncharacterized protein                                                          | IPI00922694      | 0 | 2 | 0  |
| Ig lambda chain V region 4A                                                      | IPI00022890      | 1 | 0 | 0  |
| Actin-related protein 2                                                          | IPI00005159      | 0 | 0 | 8  |
| Extracellular glycoprotein lacritin                                              | IPI00020487      | 0 | 3 | 0  |
| Isoform 1 of Glycerophosphodiester phosphodiesterase domain-containing protein 4 | IPI00179751 (+1) | 2 | 0 | 0  |
| Uncharacterized protein                                                          | IPI00472782 (+1) | 0 | 4 | 0  |
| Isoform 1 of Holliday junction recognition protein                               | IPI00301465 (+2) | 2 | 0 | 0  |
| Apolipoprotein A-II                                                              | IPI00021854      | 0 | 2 | 0  |
| Isoform 1 of Protein arginine N-methyltransferase 3                              | IPI00401321 (+2) | 0 | 0 | 4  |
| DNA-(apurinic or apyrimidinic site) lyase 2                                      | IPI00083281      | 2 | 2 | 0  |
| Isoform 1 of 45 kDa calcium-binding protein                                      | IPI00106646      | 2 | 0 | 0  |
| Isoform 1 of RNA-binding protein 5                                               | IPI00005036 (+1) | 2 | 0 | 0  |
| Translin                                                                         | IPI00018768 (+2) | 0 | 4 | 0  |
| Isoform 1 of Bromodomain-containing protein 8                                    | IPI00019226      | 4 | 0 | 0  |
| Mammaglobin-B                                                                    | IPI00026126      | 0 | 4 | 0  |
| Serum paraoxonase/arylesterase 1                                                 | IPI00218732 (+1) | 0 | 4 | 0  |
| Superoxide dismutase [Cu-Zn]                                                     | IPI00218733 (+1) | 0 | 0 | 4  |
| Inter-alpha-trypsin inhibitor heavy chain H1                                     | IPI00292530 (+1) | 4 | 0 | 0  |
| Isoform 2 of Protein disulfide-isomerase A6                                      | IPI00299571 (+4) | 7 | 0 | 0  |
| Apolipoprotein A-IV                                                              | IPI00304273      | 0 | 2 | 0  |
| Keratin, type I cytoskeletal 19                                                  | IPI00479145      | 0 | 0 | 4  |
| 51 kDa protein                                                                   | IPI00646774      | 0 | 2 | 0  |
| Uncharacterized protein                                                          | IPI00789324      | 0 | 2 | 0  |
| 13 kDa protein                                                                   | IPI00829845      | 0 | 0 | 4  |
| Isoform 2 of Transmembrane protein 132D                                          | IPI00845291      | 0 | 2 | 0  |
| Alcohol dehydrogenase class 4 mu/sigma chain                                     | IPI00872487 (+2) | 4 | 0 | 0  |
| Tissue alpha-L-fucosidase                                                        | IPI00843910      | 2 | 0 | 0  |
| Similar to AUTS2-like protein                                                    | IPI00973550      | 2 | 0 | 0  |



**Table S1: Complete list of identified proteins in HB, HC and Control (C) groups.**

|                                                                  |                  |   |   |   |
|------------------------------------------------------------------|------------------|---|---|---|
| Leucine-rich repeat and WD repeat-containing protein KIAA1239    | IPI00166979      | 2 | 0 | 0 |
| Vitronectin                                                      | IPI00298971 (+1) | 0 | 0 | 4 |
| Isoform 1 of Origin recognition complex subunit 3                | IPI00294402 (+3) | 2 | 0 | 0 |
| Testis-specific serine/threonine-protein kinase 1                | IPI00012465      | 2 | 0 | 0 |
| Origin recognition complex subunit 6                             | IPI00001641      | 2 | 0 | 0 |
| Isoform 1 of HBS1-like protein                                   | IPI00009070 (+6) | 2 | 0 | 0 |
| ADP-ribosylation factor-like protein 8A                          | IPI00060031      | 2 | 0 | 0 |
| Isoform 1 of Splicing regulatory glutamine/lysine-rich protein 1 | IPI00103497 (+1) | 2 | 0 | 0 |
| Protein notum homolog                                            | IPI00465159 (+1) | 2 | 0 | 0 |
